# Supplementary material
Source: PubMed Central journal article supplement (PMC3088485)
Supplement: NIHMS292671-supplement-01.pdf [file NIHMS292671-supplement-01.pdf]

## Supplemental Information

### Interleukin-10 Signaling in Regulatory T Cells

### Is Required for Suppression

### of Th17 Cell-Mediated Inflammation

Ashutosh Chaudhry, Robert M. Samstein, Piper Treuting, Yuqiong Liang, Marina C. Pils, Jan-Michael Heinrich, Robert S. Jack, F. Thomas Wunderlich, Jens C. Brünig, Werner Müller, and Alexander Y. Rudensky

Inventory of Supplemental Information:

Supplementary Figure 1 accompanies Figure 1 and shows efficiency of (A) IL-6R $\alpha$  and (B) IL-10R $\alpha$  deletion by Foxp3<sup>Cre</sup>.

Supplementary Figure 2 accompanies Figure 2 and shows complete absence of inflammation in *Foxp3*<sup>Cre/wt</sup>*Il10ra*<sup>fl/fl</sup> mice.

Supplementary Figure 3 accompanies Figure 3 and shows that Treg cell-specific inducible deletion of IL-10R $\alpha$  does not lead to aberrant expression of Th1, Th2 and Th17 transcription factors and cytokines.

Supplementary Figure 4 and 5 accompany Figure 4 and demonstrate that lack of IL-6R $\alpha$  or IL-23R on Treg cells does not result in dysregulation of immune responses.

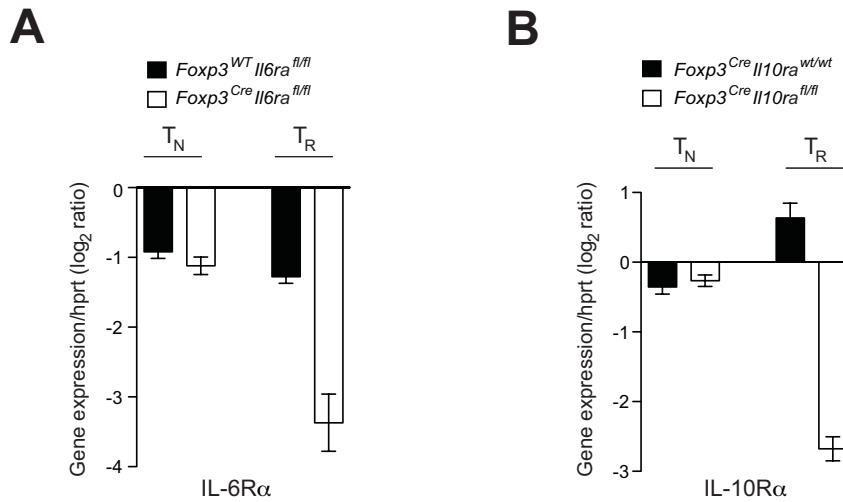

**Figure S1.** *Foxp3<sup>Cre</sup>*-mediated deletion is restricted to Treg cells.  
(A, B) qPCR analysis of IL-6R $\alpha$  and IL-10R $\alpha$  mRNA levels in RNA extracted from indicated cell populations.

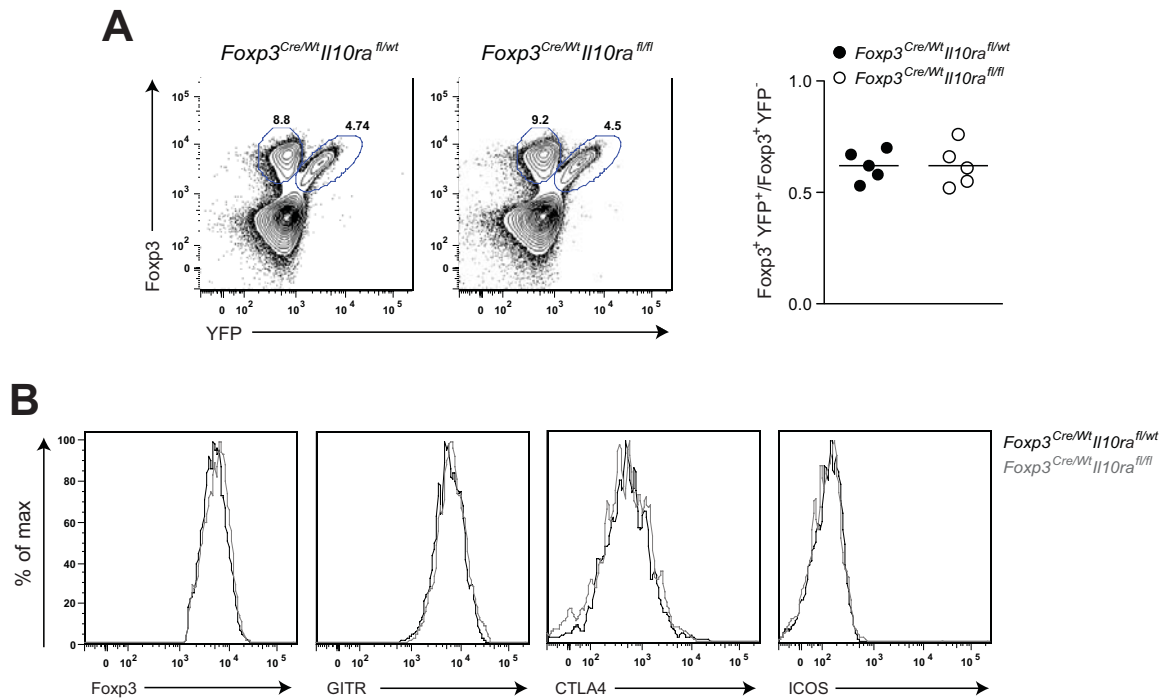

**Figure S2.** Absence of inflammation in heterozygous females.  
(A) Relative frequencies of CD4<sup>+</sup>Foxp3<sup>+</sup>YFP<sup>+</sup> and CD4<sup>+</sup>Foxp3<sup>+</sup>YFP<sup>-</sup> Treg cells in the spleen of *Foxp3<sup>Cre/Wt</sup> Il10ra<sup>fl/wt</sup>* and *Foxp3<sup>Cre/Wt</sup> Il10ra<sup>fl/fl</sup>* mice. (B) Flow cytometric analysis of Foxp3 levels as well as Treg cell activation and putative effector molecules on splenic CD4<sup>+</sup>YFP<sup>+</sup> Treg cells in *Foxp3<sup>Cre/Wt</sup> Il10ra<sup>fl/fl</sup>* and control littermate mice.

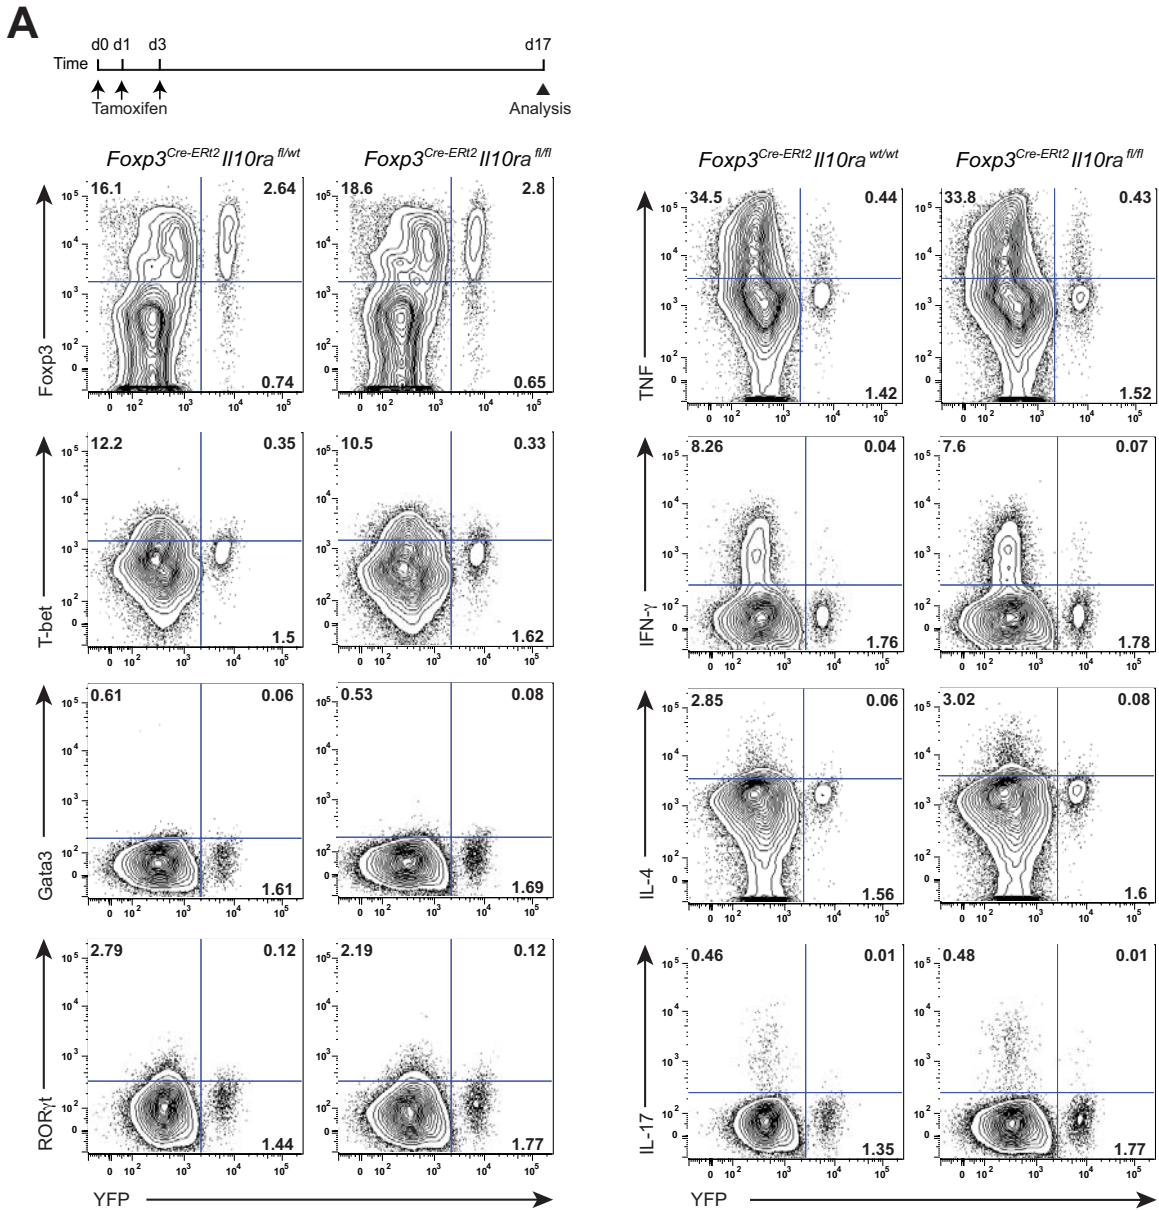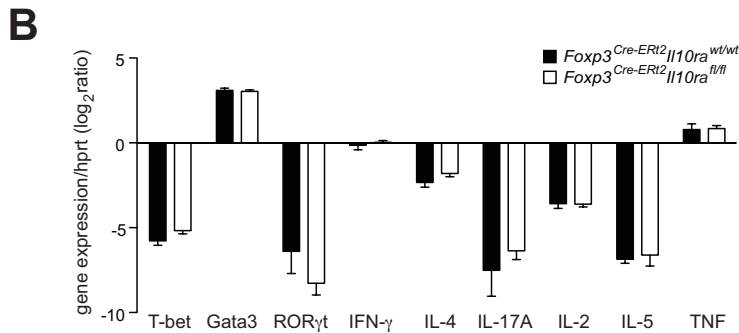

**Figure S3.** Treg-specific IL-10R deletion does not result in aberrant expression of Th1, Th2, and Th17 transcription factors and cytokines. (A) Flow cytometric analysis of cytokine production and transcription factor expression from splenic CD4<sup>+</sup> T cells

isolated from tamoxifen-fed  $Foxp3^{Cre-Ert2}Il10ra^{wt/wt}$  and  $Foxp3^{Cre-Ert2}Il10ra^{fl/fl}$  mice stimulated in presence of PMA and Ionomycin for 4-6h. (B) qPCR analysis of indicated mRNA expression in FACS-sorted  $CD4^+YFP^+$  T cells from  $Foxp3^{Cre-Ert2}Il10ra^{wt/wt}$  and  $Foxp3^{Cre-Ert2}Il10ra^{fl/fl}$  mice.

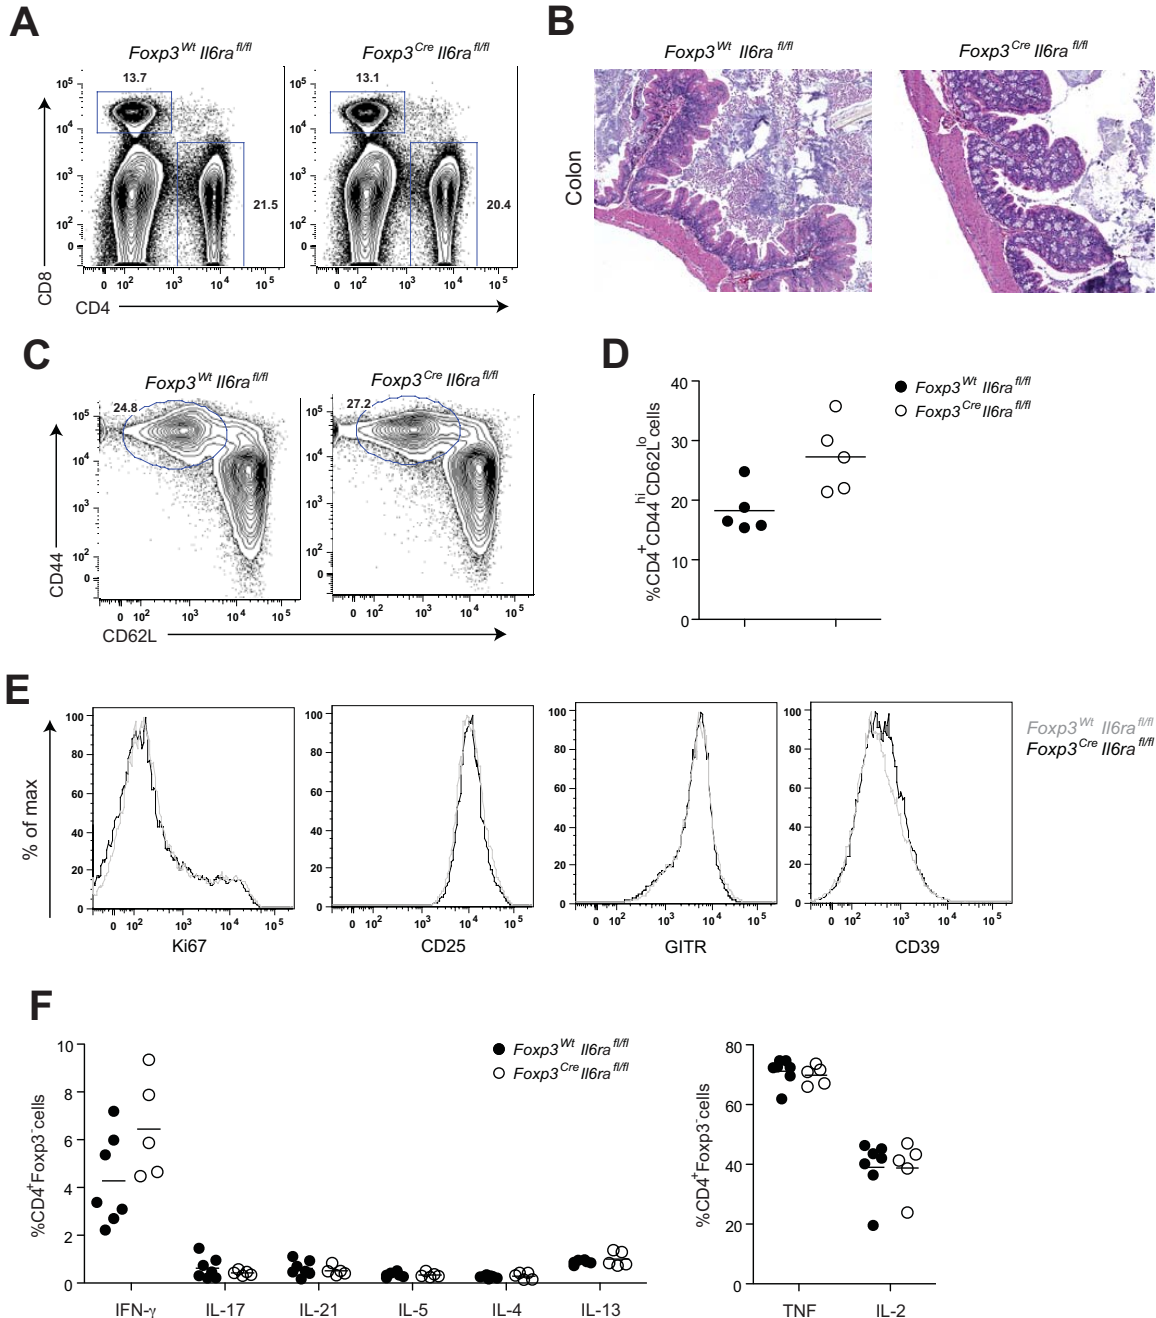

**Figure S4.** Treg-specific IL-6R deletion does not result in dysregulation of immune responses.

(A) Relative frequencies of CD4 and CD8 T cells in the spleen of  $Foxp3^{Wt}Il6ra^{fl/fl}$  and  $Foxp3^{Cre}Il6ra^{fl/fl}$  mice. (B) Representative H&E stained sections of colon tissues from  $Foxp3^{Cre}Il6ra^{fl/fl}$  mice and littermate controls. (C,D) Similar frequencies of activated cells

in *Foxp3<sup>Cre</sup>Il6ra<sup>fl/fl</sup>* mice (E) Flow cytometric analysis of Treg activation markers and putative effector molecules on splenic CD4<sup>+</sup>Foxp3<sup>+</sup> T cells in *Foxp3<sup>Cre</sup>Il6ra<sup>fl/fl</sup>* and control littermate mice. (F) Flow cytometric analysis of cytokine production by splenic CD4<sup>+</sup>Foxp3<sup>+</sup> T cells in *Foxp3<sup>Wt</sup>Il6ra<sup>fl/fl</sup>* and *Foxp3<sup>Cre</sup>Il6ra<sup>fl/fl</sup>* mice.

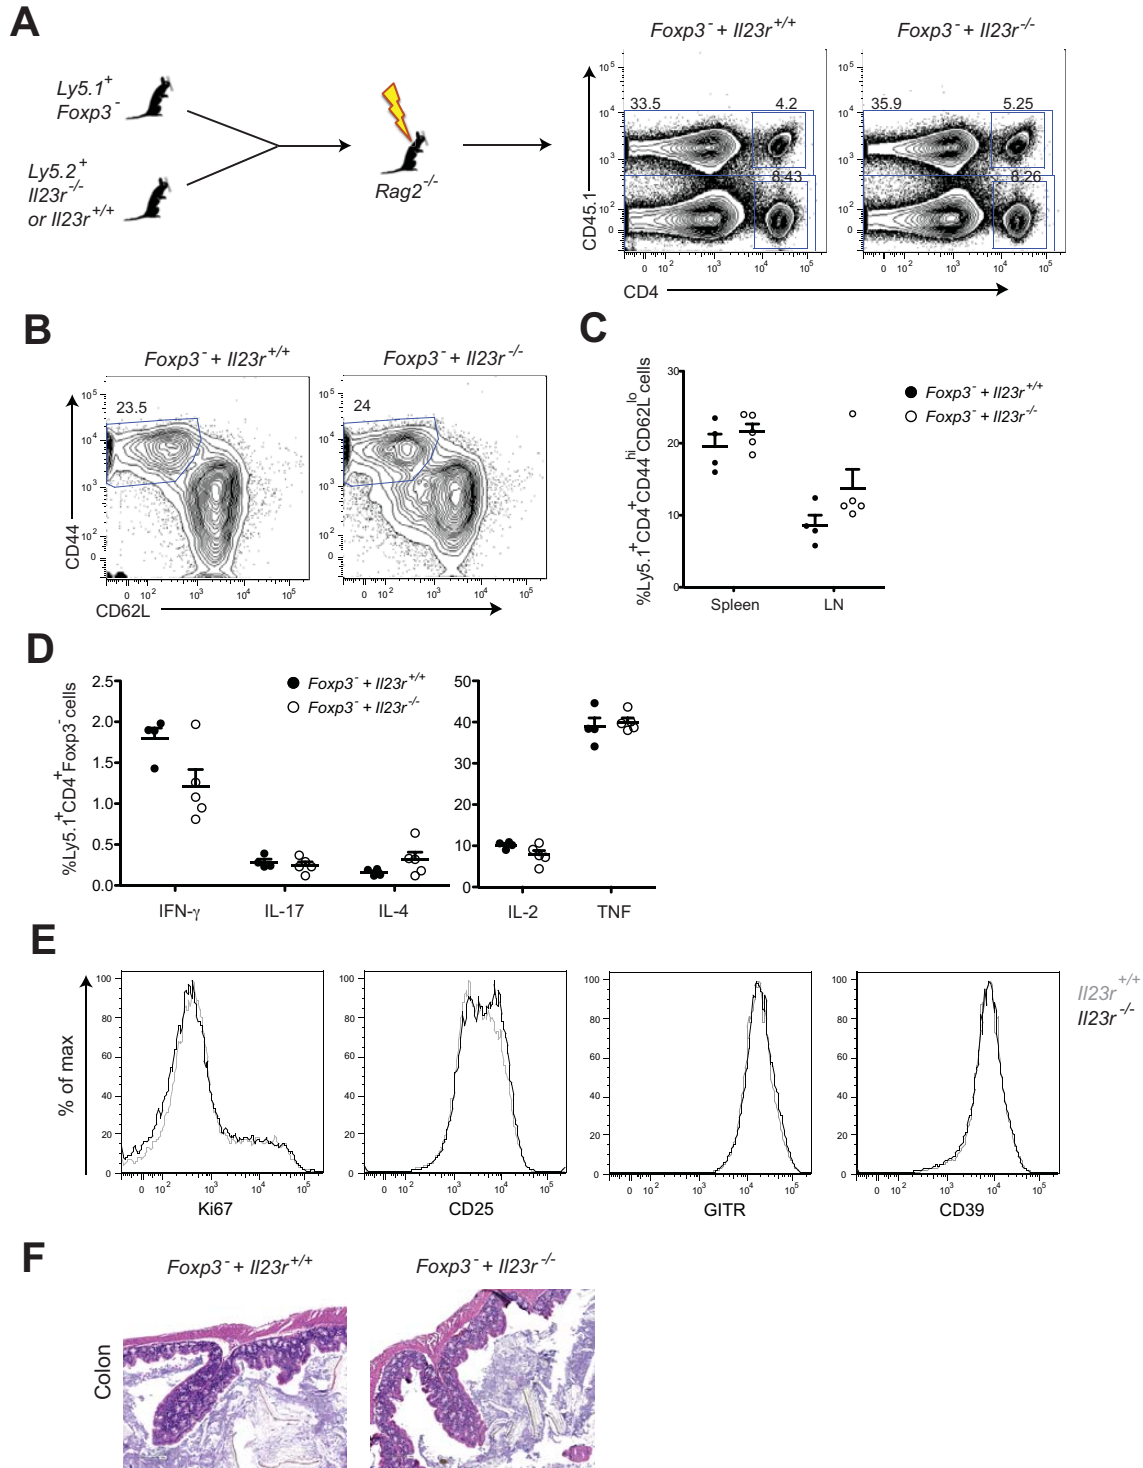

**Figure S5.** IL-23R-deficient Treg cells exhibit intact suppressor capacity *in vivo*. (A) Schematic representation of BM chimeras and relative reconstitution of CD4 T cells. (B,C) Similar frequencies of activated cells in chimeras harboring WT and IL-23R-deficient Treg cells. (D,E) Flow cytometric analysis of cytokine production by splenic CD4<sup>+</sup>Foxp3<sup>+</sup> T cells in the presence of WT or IL-23R-deficient Treg cells. (F) Flow cytometric analysis of Treg activation markers and putative effector molecules on splenic

CD4<sup>+</sup>Foxp3<sup>+</sup> T cells in BM chimeras. (G) Representative H&E stained sections of colon tissues from BM chimeras harboring WT or IL-23R deficient Treg cells.
